# Supplementary material for: The inherent flexibility of receptor binding domains in SARS-CoV-2 spike protein
Source: eLife journal article supplement (doi:10.7554/elife.75720), 2022-03-16

**a**

**Epitope region** (B38) 403–409, 415–421, 455–459, 473–479, 486–505  
(C002) 444–452, 470–473, 481–494  
(S309) 337–344, 356–361, 440–444  
(CR3022) 369–392, 427–430, 515–517

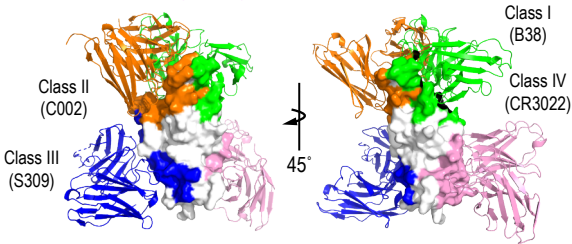**c**

**Crash score in antibody (aligned with “up” RBD) – S-protein pairs**  
Number of overlapping Ca atoms (< 5Å distance) between the aligned antibody and S-protein

|                 | S309 (Class III)<br>PDB: 6WPT | C002 (Class II)<br>PDB: 7K8T | C105 (Class I)<br>PDB: 6XCM |
|-----------------|-------------------------------|------------------------------|-----------------------------|
| 1U              | 0                             | 0                            | 2                           |
| 1U <sub>o</sub> | 11                            | 0                            | 0                           |
| 2U <sub>L</sub> | 0                             | 0                            | 6                           |

**b**

**Bind both “up” and “down”**

**Bind only “up”**

S309 (Class III)  
PDB: 6WPT

C002 (Class II)  
PDB: 7K8T

C105 (Class I)  
PDB: 6XCM

**1U**

Fab  
S309  
(bound to “down”)

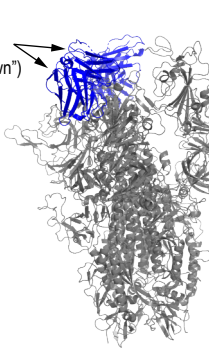

Fab  
C002  
(bound to “down”)

Fab  
S309  
(bound to “up”)

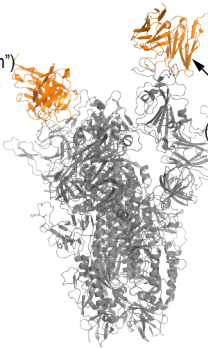

Fab  
C002  
(bound to “up”)

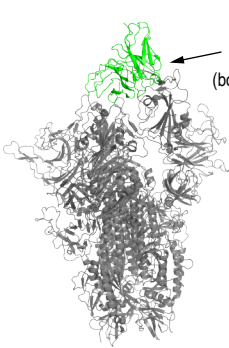

Fab  
C105  
(bound to “up”)

**1U<sub>o</sub>**

Fab  
S309  
(bound to “down”)

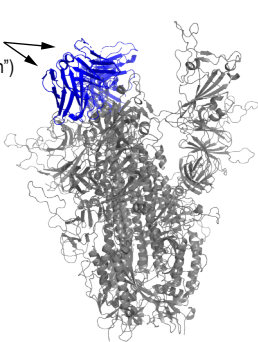

Fab  
C002  
(bound to “down”)

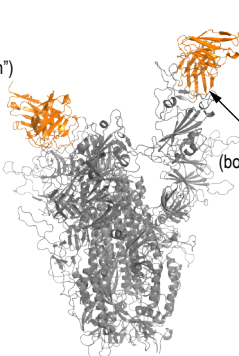

Fab  
C002  
(bound to “up”)

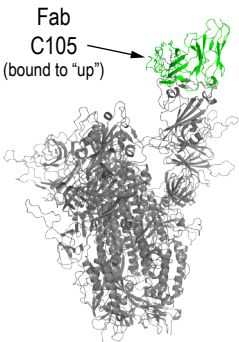

Fab  
C105  
(bound to “up”)

**2U<sub>L</sub>**

Fab  
S309  
(bound to “down”)

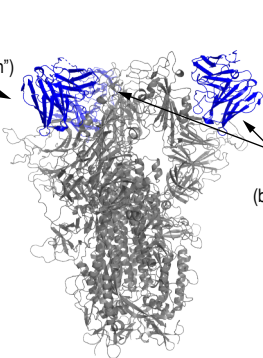

Fab  
S309  
(bound to “up”)

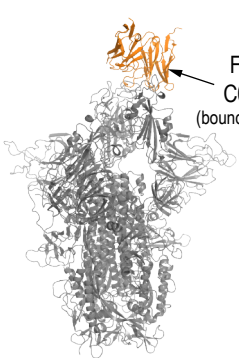

Fab  
C002  
(bound to “up”)

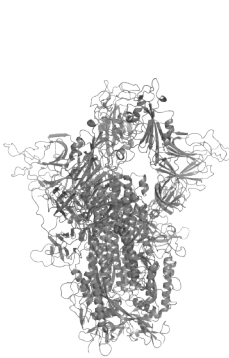

Supplement: supp [file elife-75720-supp-v1.zip]
