# Supplementary material for: The inherent flexibility of receptor binding domains in SARS-CoV-2 spike protein
Source: eLife journal article supplement (doi:10.7554/elife.75720), 2022-03-16

# 1) k-means Clustering (RBD/NTD)

Hinge<sub>A</sub> ——— Hinge<sub>B</sub> ——— Hinge<sub>C</sub> ———  
 Twist<sub>A</sub> - - - - - Twist<sub>B</sub> - - - - - Twist<sub>C</sub> - - - - -

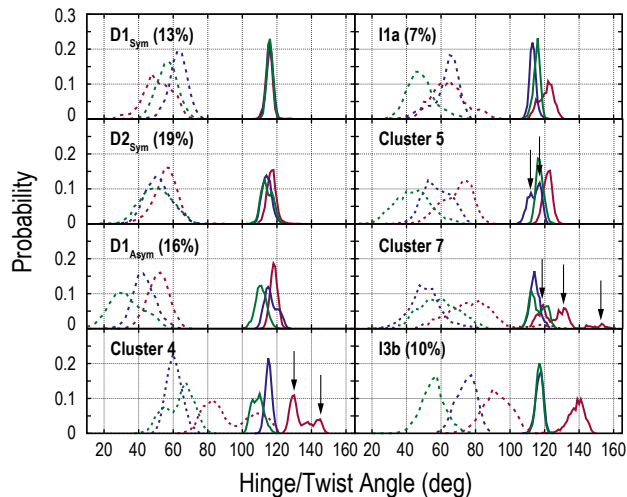

## 2) Re-cluster (clusters with multi-distribution)

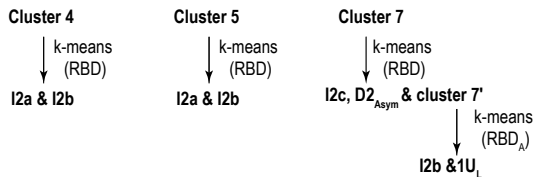

## 3) Refined Clusters

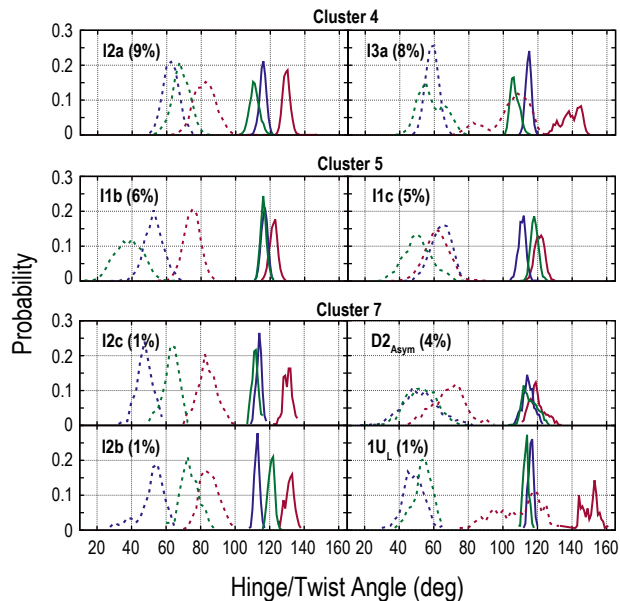

Supplement: supp [file elife-75720-supp-v1.zip]
