# Supplementary material for: The inherent flexibility of receptor binding domains in SARS-CoV-2 spike protein
Source: eLife journal article supplement (doi:10.7554/elife.75720), 2022-03-16
Supplement: supp [file elife-75720-supp-v1.zip]

Down<sub>Sym</sub>

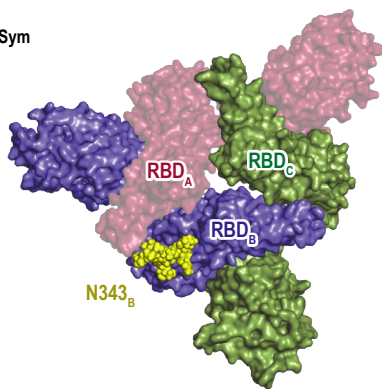

D1<sub>Sym</sub>

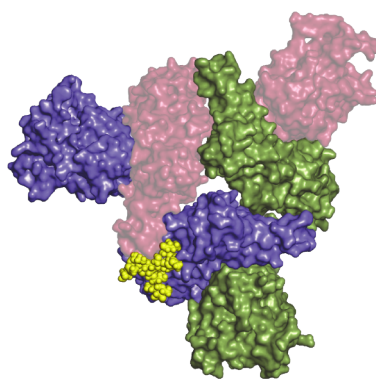

D2<sub>Sym</sub>

Down<sub>Like</sub> (D<sub>Asym</sub>)

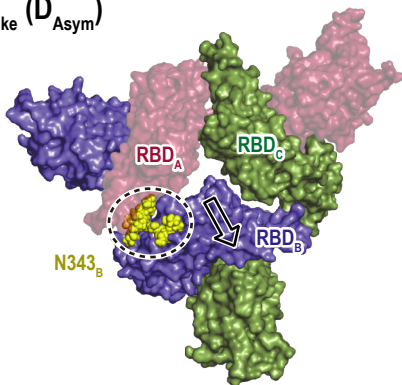

D1<sub>Asym</sub>

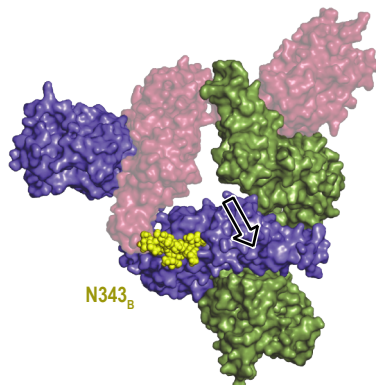

D2<sub>Asym</sub>

Down<sub>Like</sub> (Int1)

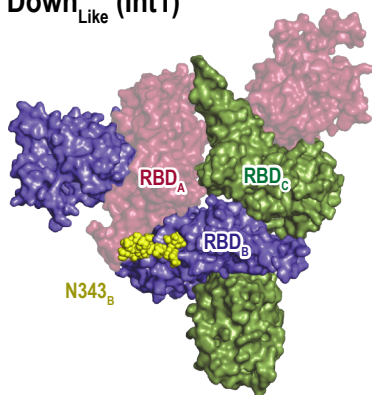

I1a

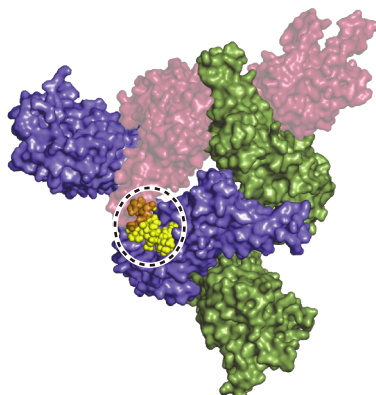

I1b

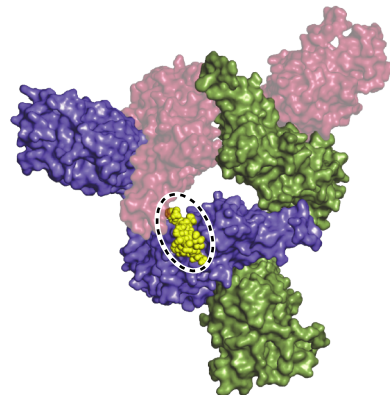

I1c
