# Supplementary material for: The inherent flexibility of receptor binding domains in SARS-CoV-2 spike protein
Source: eLife journal article supplement (doi:10.7554/elife.75720), 2022-03-16
Supplement: supp [file elife-75720-supp-v1.zip]

### Glycosylation Site: T323

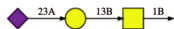

O-glycan

### Glycosylation Site: N282

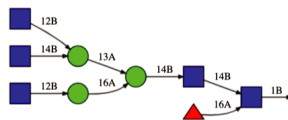

HexNAc(5)Hex(3) Fuc(1) Complex

### Glycosylation Site: N74

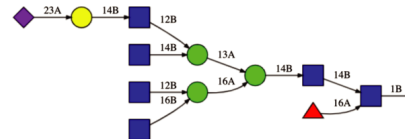

HexNAc(6)Hex(4) Fuc(1) NeuAc(1) Complex

### Glycosylation Sites: N61, N122, N603, N709, N717, N801, N1074

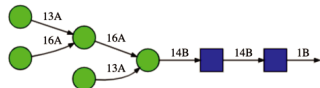

HexNAc(2)Hex(5) High-Mannose

### Glycosylation Site: N234

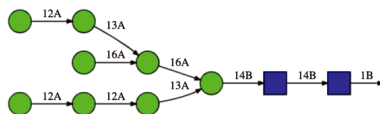

HexNAc(2)Hex(8) High-Mannose

### Glycosylation Site: N657

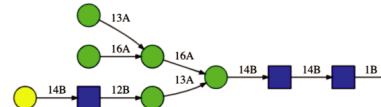

HexNAc(3)Hex(6) Hybrid

### Glycosylation Sites: N149, N331, N343, N616, N113

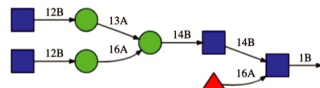

HexNAc(4)Hex(3) Fuc(1) Complex

### Glycosylation Site: N1098

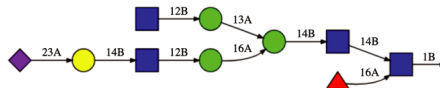

HexNAc(4)Hex(4) Complex

### Glycosylation Site: N165

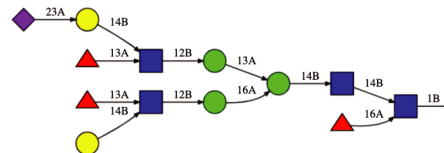

HexNAc(4)Hex(4) Fuc(1) NeuAc(1) Complex
