# Supplementary material for: The inherent flexibility of receptor binding domains in SARS-CoV-2 spike protein
Source: eLife journal article supplement (doi:10.7554/elife.75720), 2022-03-16

# "2-down 1-up"

S309 (Class III)  
PDB: 6WPT

C002 (Class II)  
PDB: 7K8T

# "1-down 2-up"

C105 (Class I)  
PDB: 6XCM

# "3-up"

C105 (Class I)  
PDB: 6XCN

1U

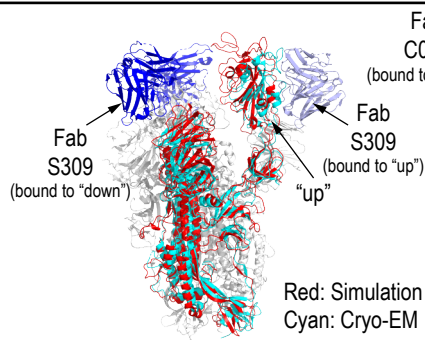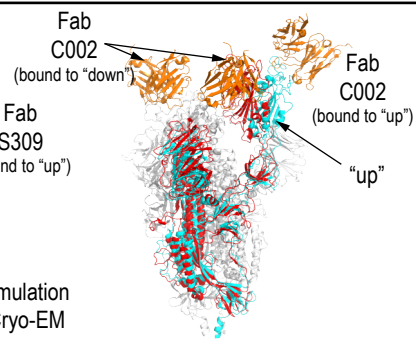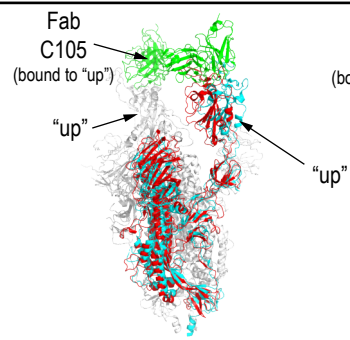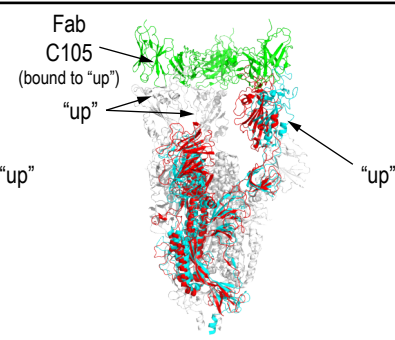

1U<sub>0</sub>

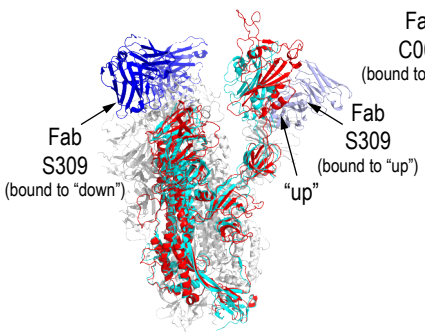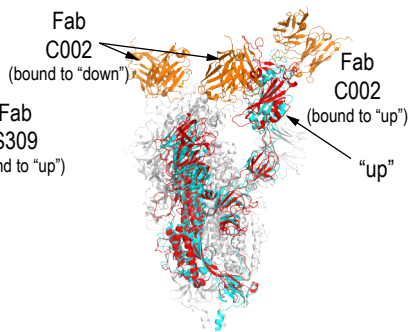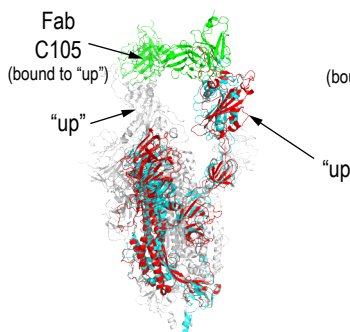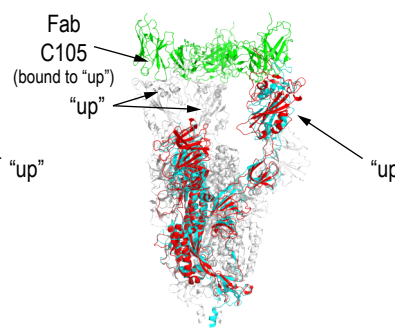

2U<sub>L</sub>

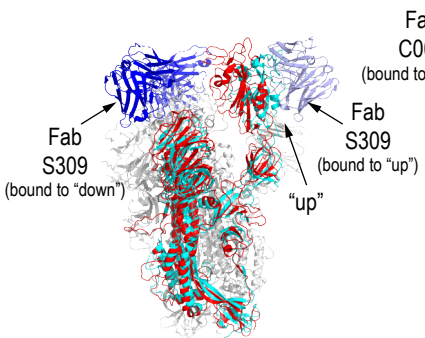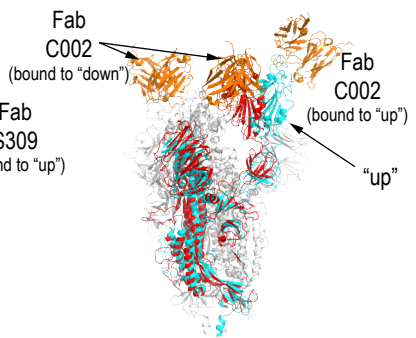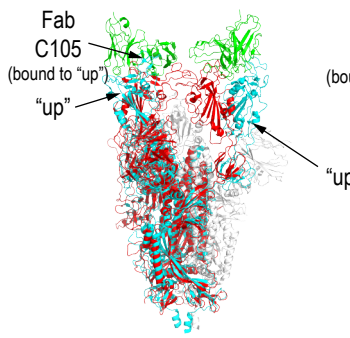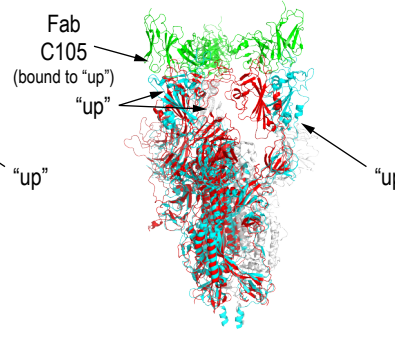

Supplement: supp [file elife-75720-supp-v1.zip]
