# Supplementary figures and images for: The inherent flexibility of receptor binding domains in SARS-CoV-2 spike protein
Source: eLife journal article supplement (doi:10.7554/elife.75720), 2022-03-16

Hinge Angle (deg)

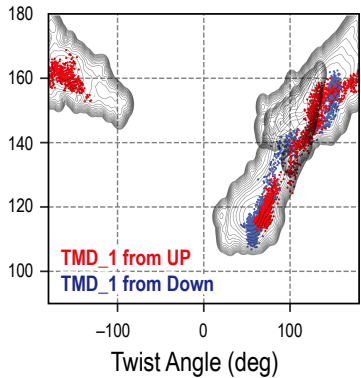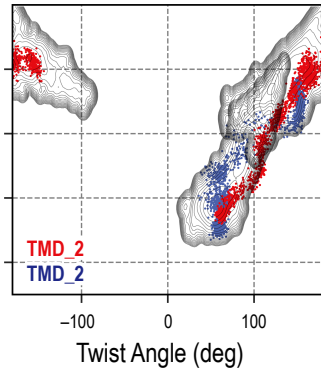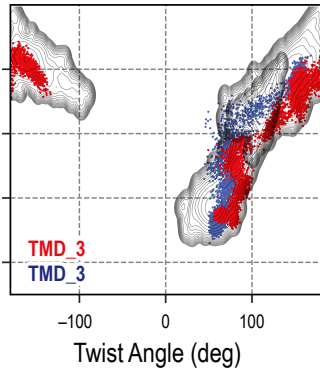

Supplement: supp [file elife-75720-supp-v1.zip]

# 1) k-means Clustering (RBD/NTD)

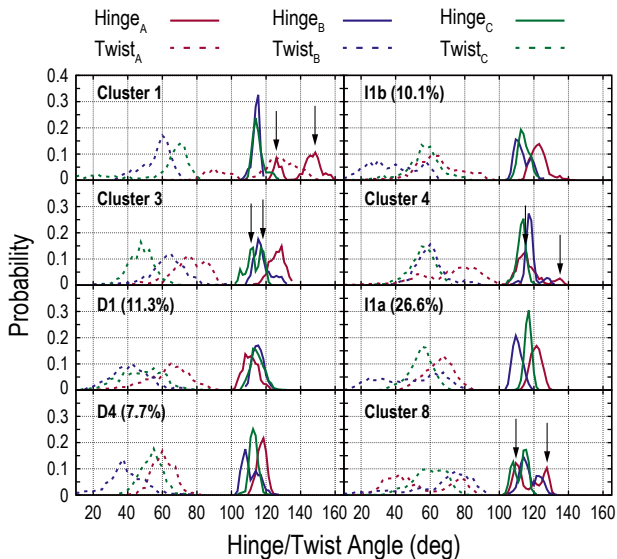

## 2) Clusters (1, 3, 4 and 8) Refinement

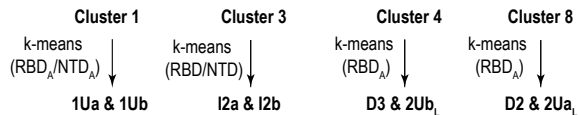

## 3) Refined Clusters

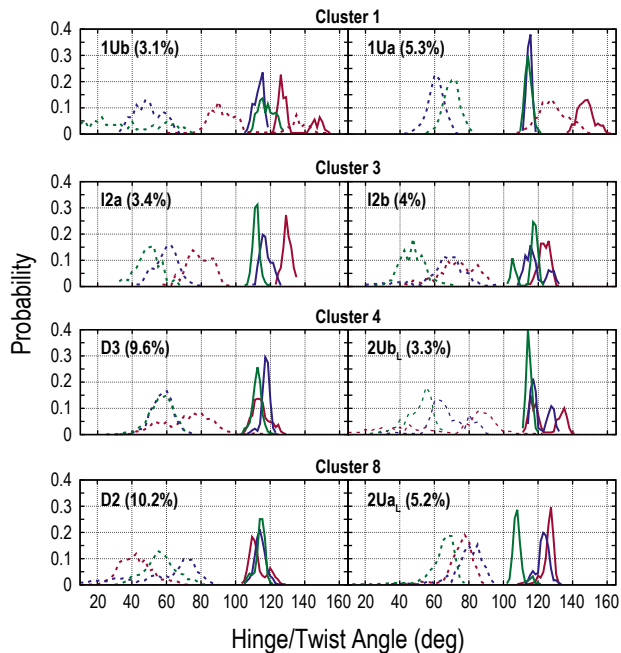

Supplement: supp [file elife-75720-supp-v1.zip]

**a**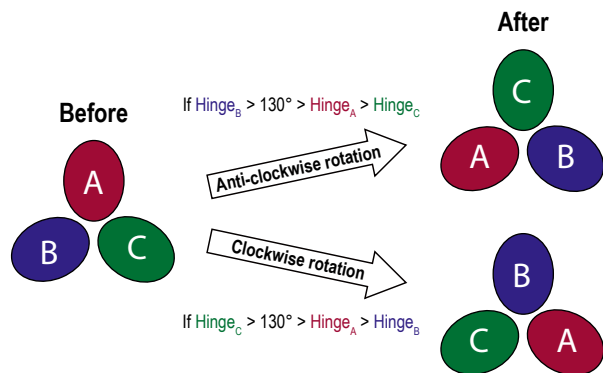**b**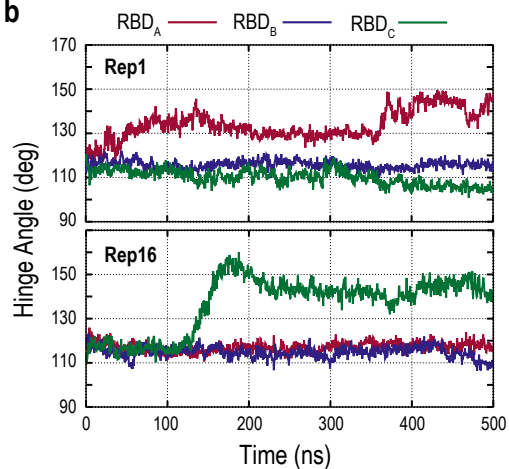**c**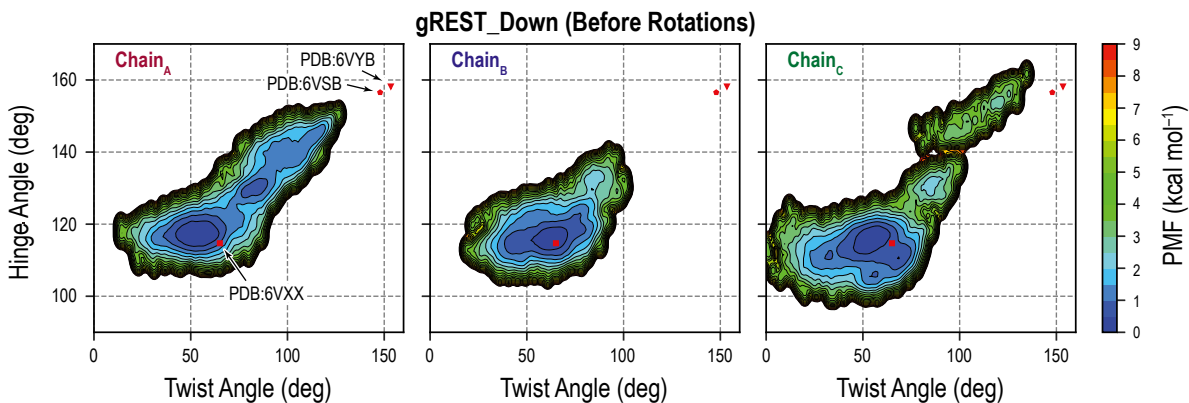**d**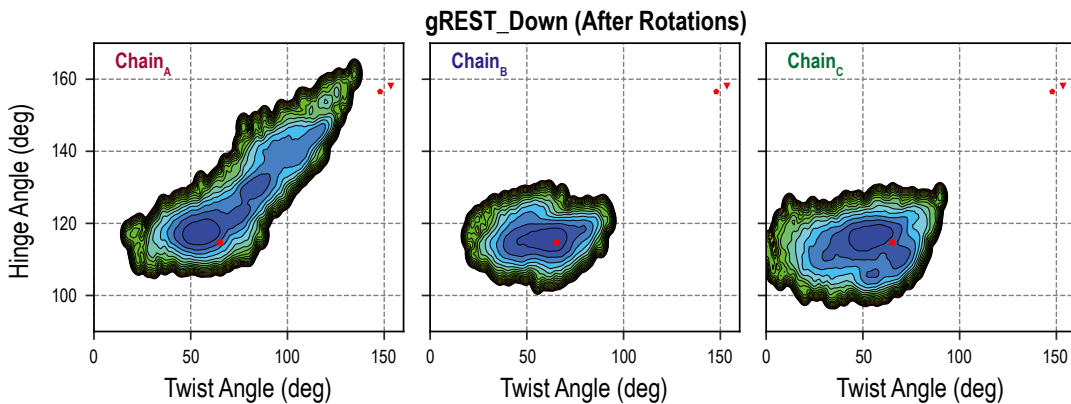

Supplement: supp [file elife-75720-supp-v1.zip]

**a**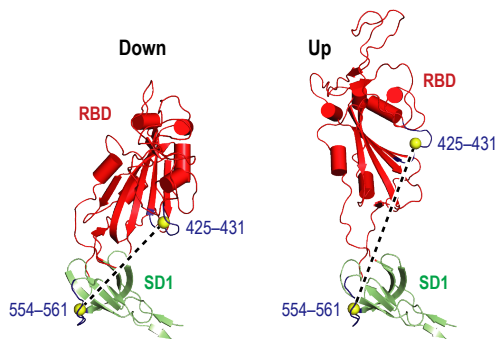**b**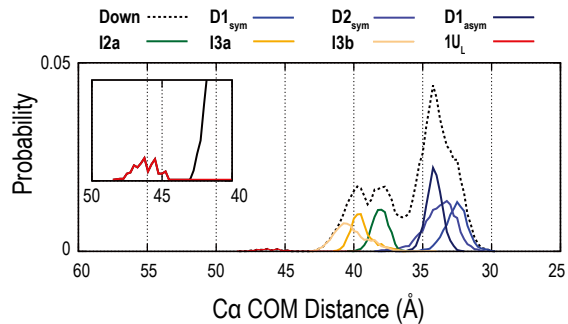**c**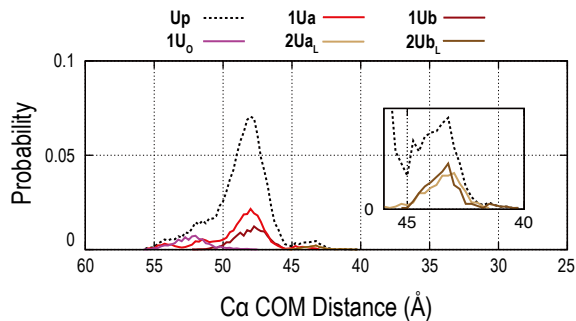**d**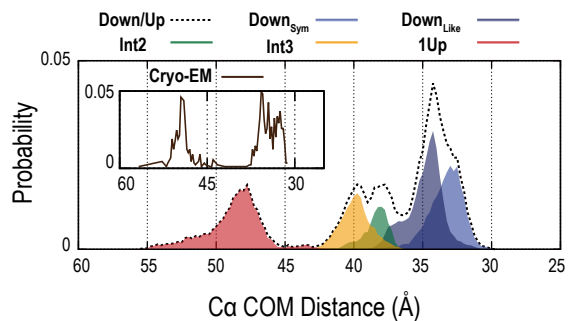**e**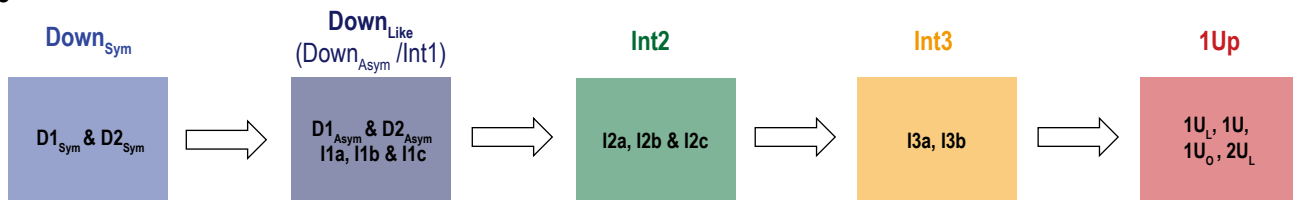

Supplement: supp [file elife-75720-supp-v1.zip]

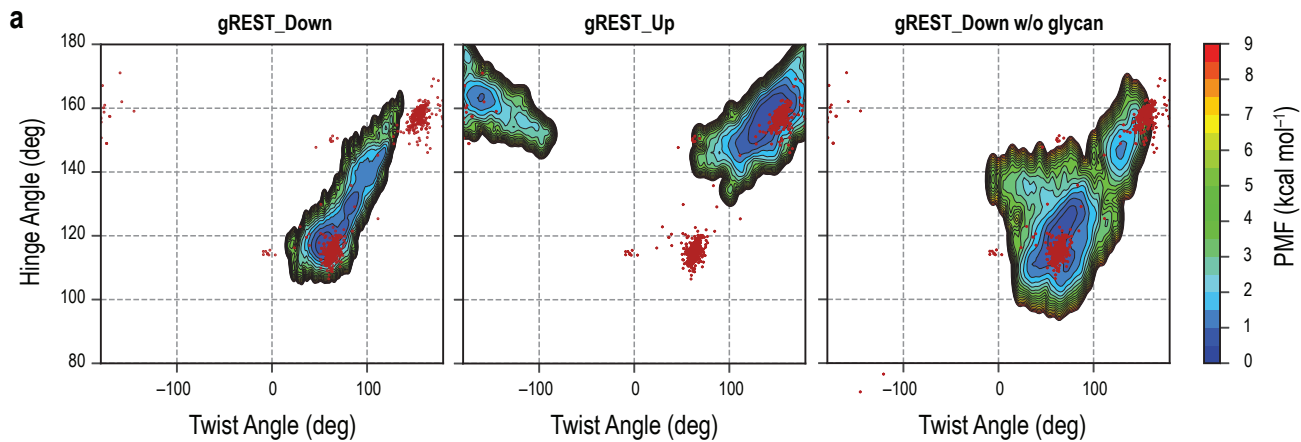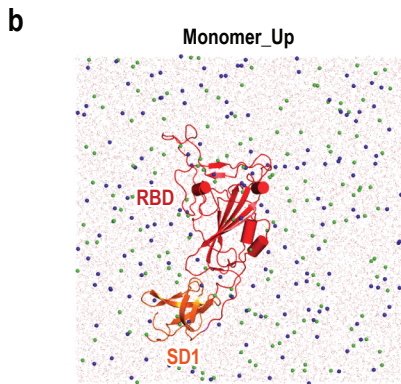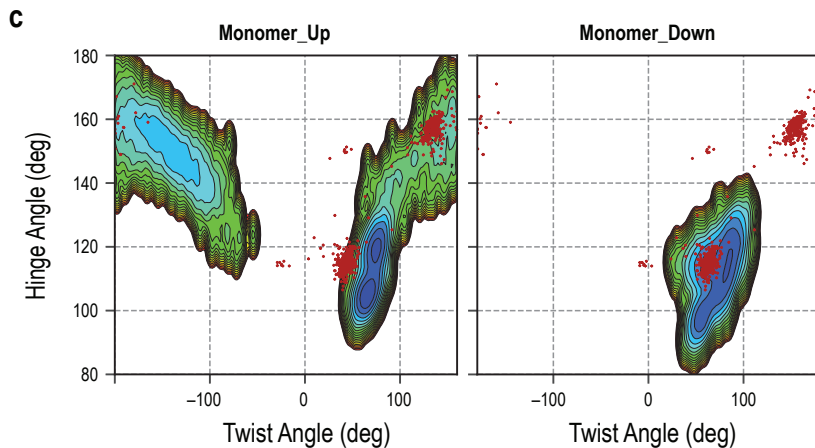

Supplement: supp [file elife-75720-supp-v1.zip]

I2a vs. PDB:7KRS

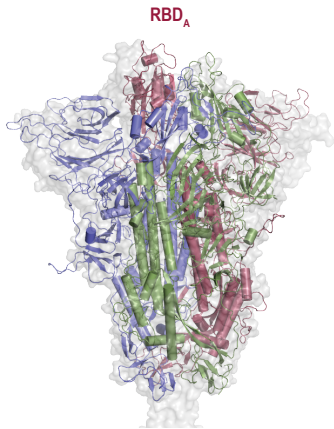

I3a vs. PDB:7KRS

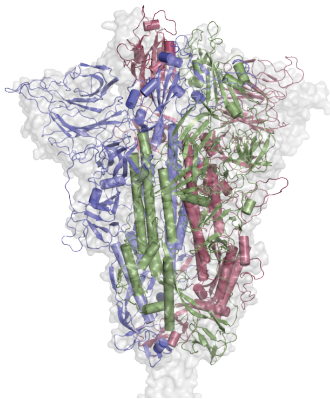

Supplement: supp [file elife-75720-supp-v1.zip]

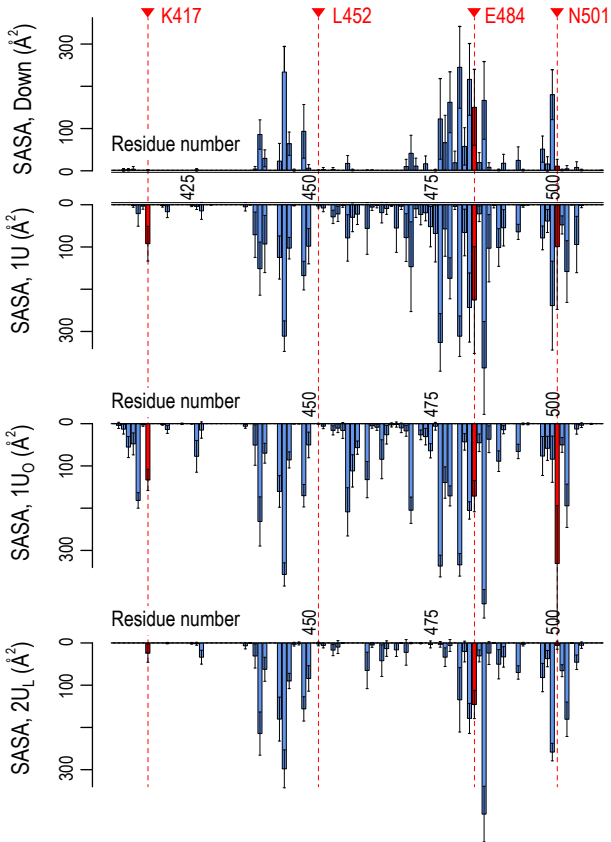

Supplement: supp [file elife-75720-supp-v1.zip]

**a**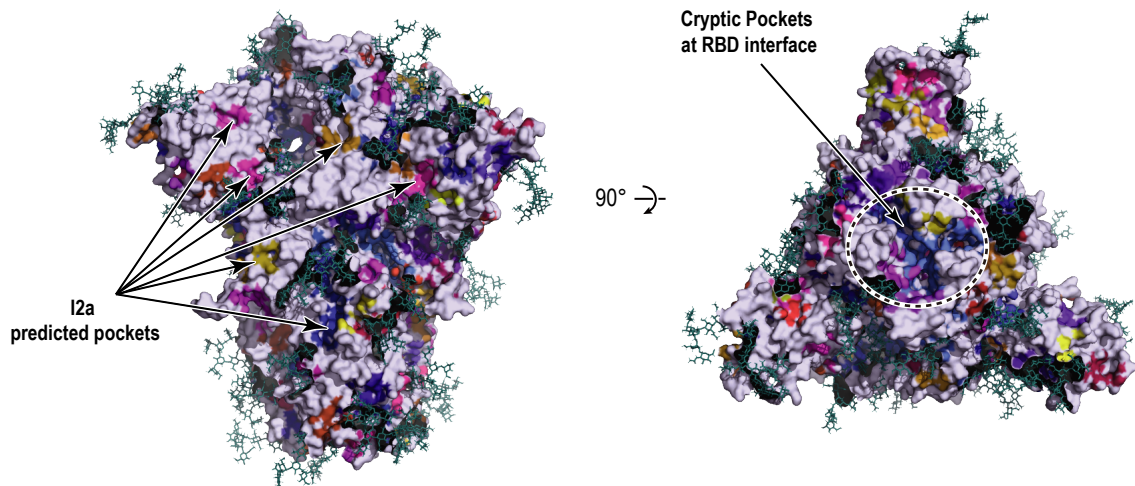**b**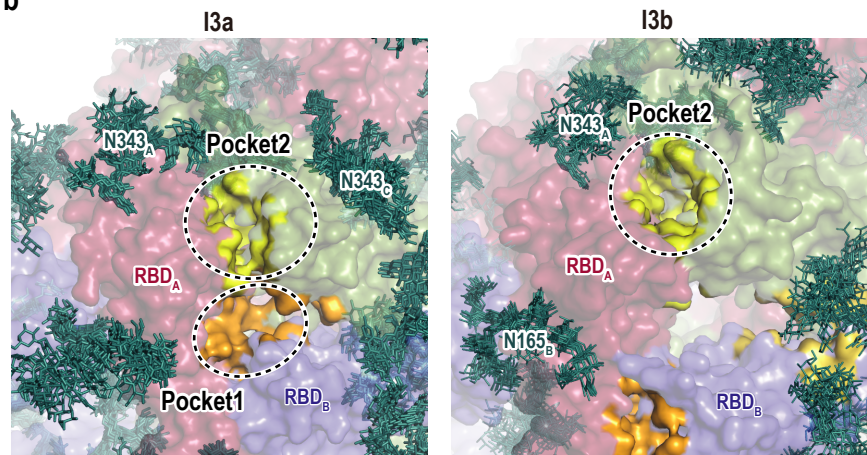**c**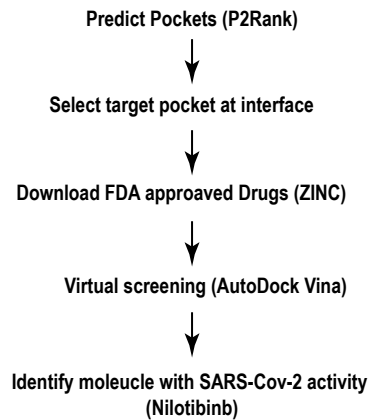**d**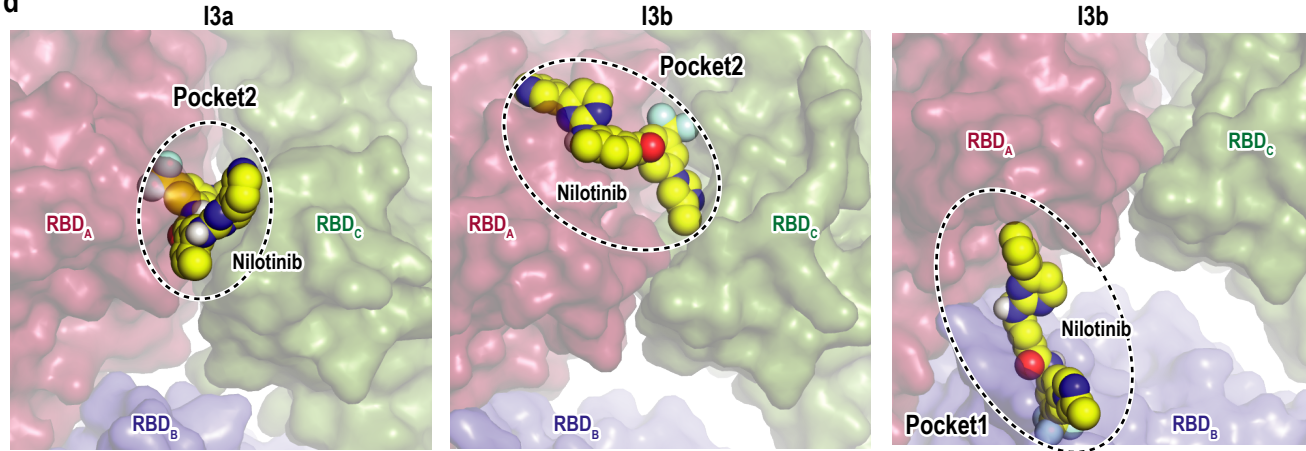

Supplement: supp [file elife-75720-supp-v1.zip]

**a**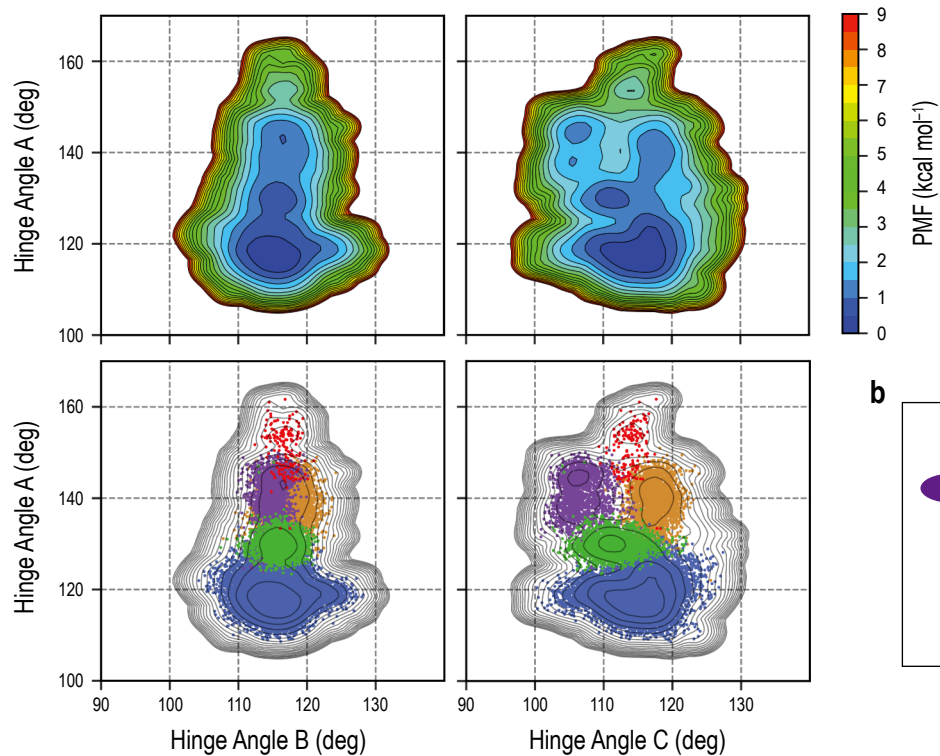**b**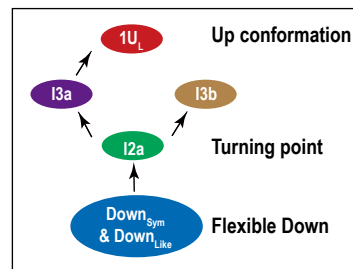**c**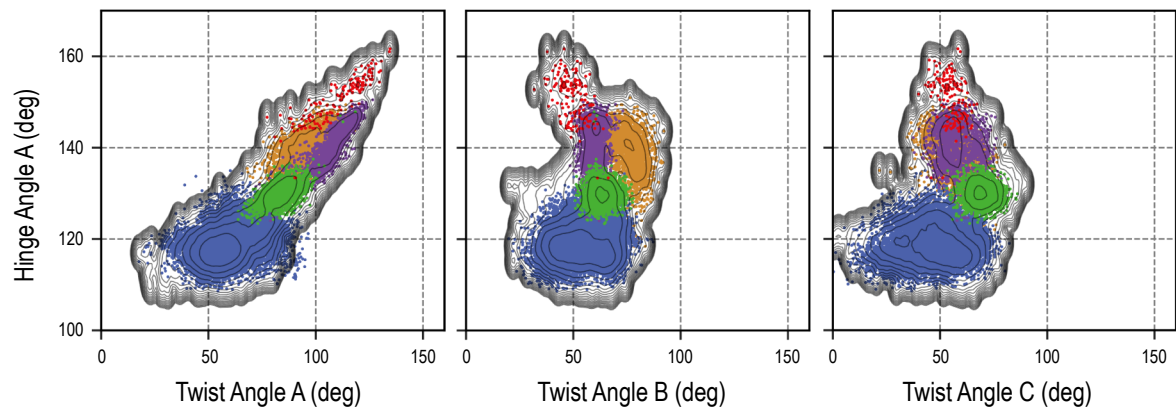

Supplement: supp [file elife-75720-supp-v1.zip]

**a**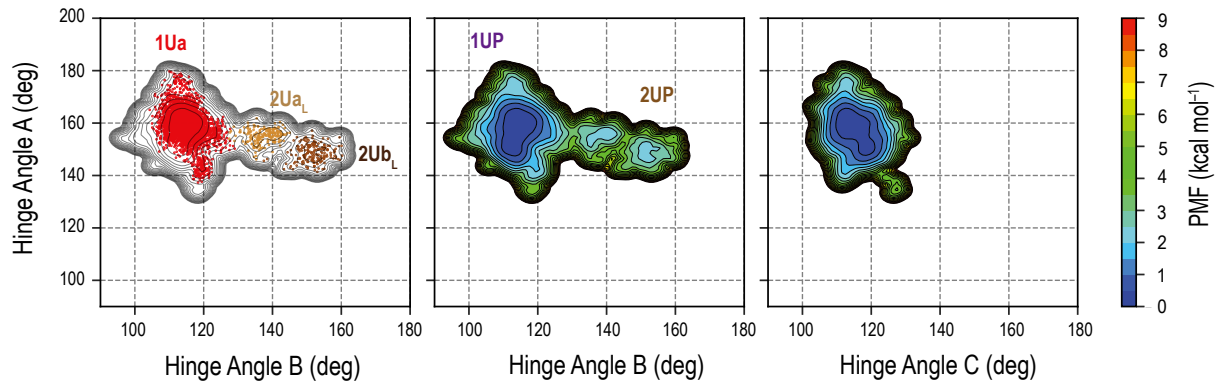**b**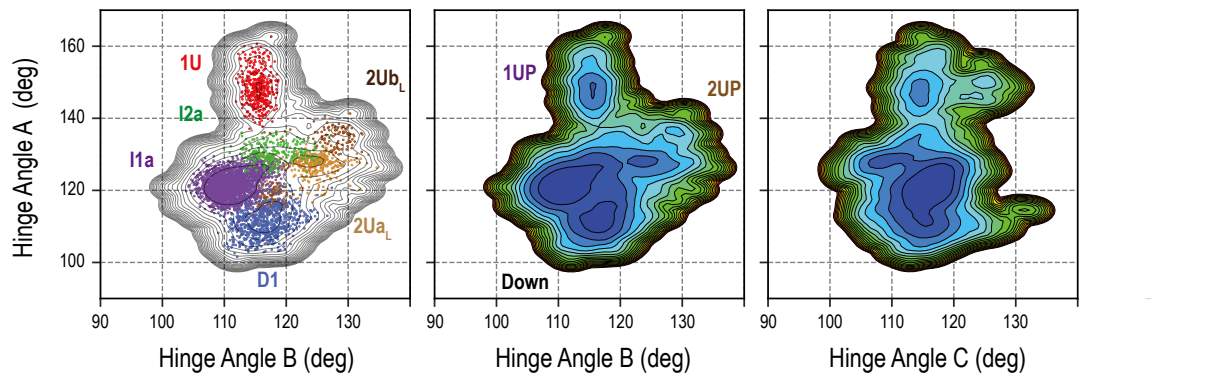

Supplement: supp [file elife-75720-supp-v1.zip]

**a**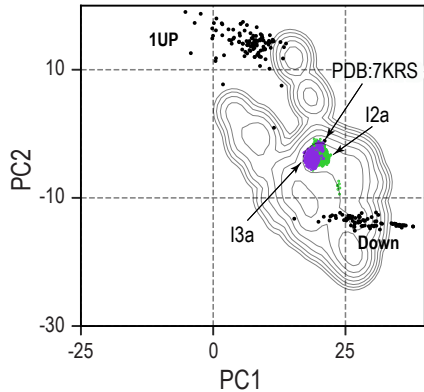**b**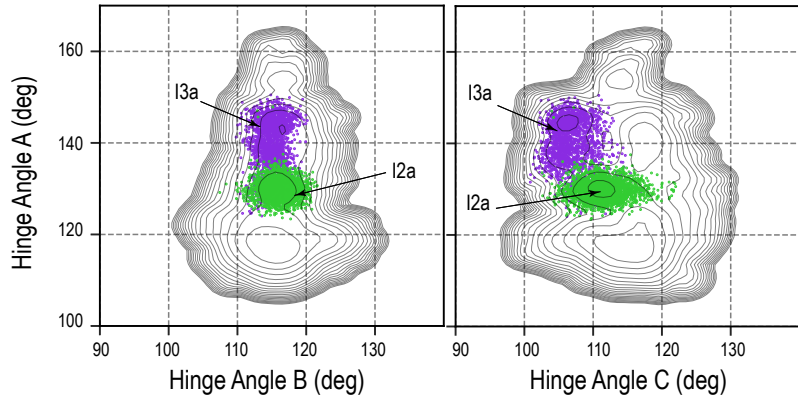

Supplement: supp [file elife-75720-supp-v1.zip]

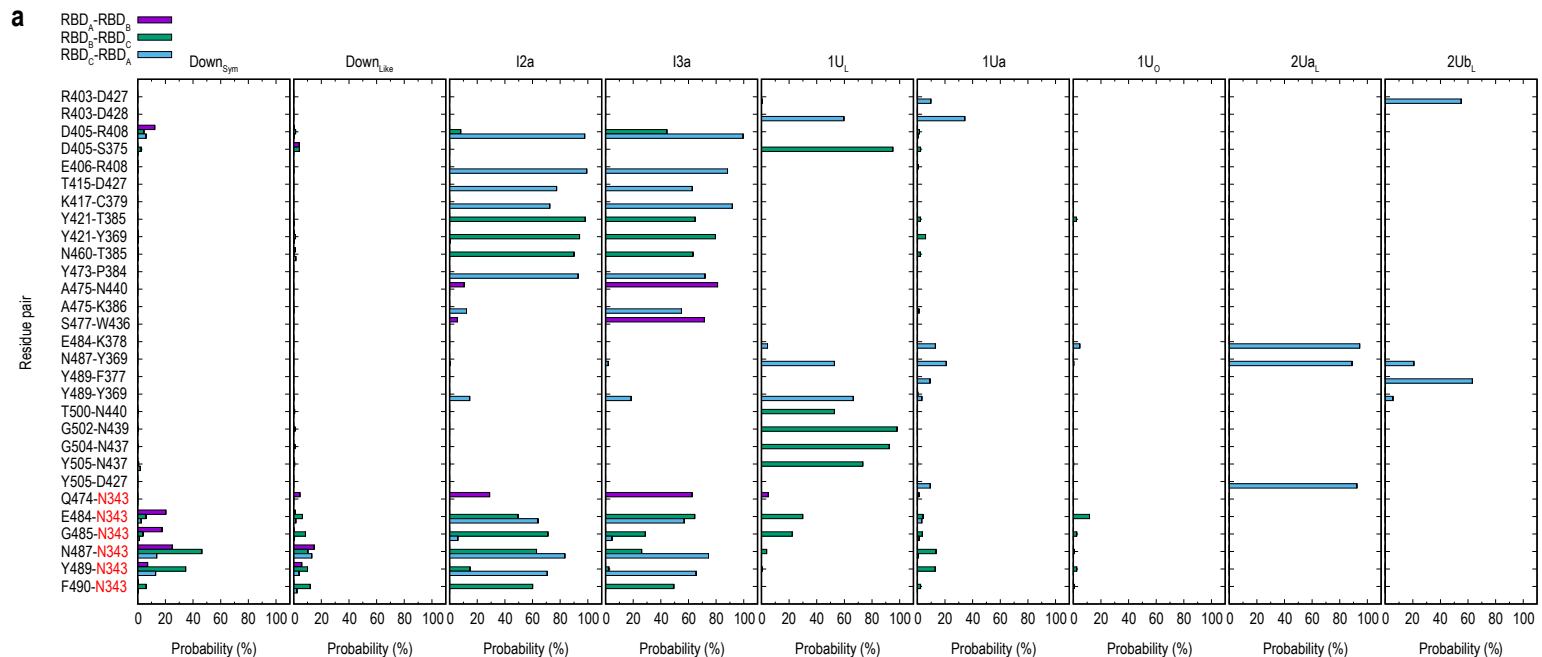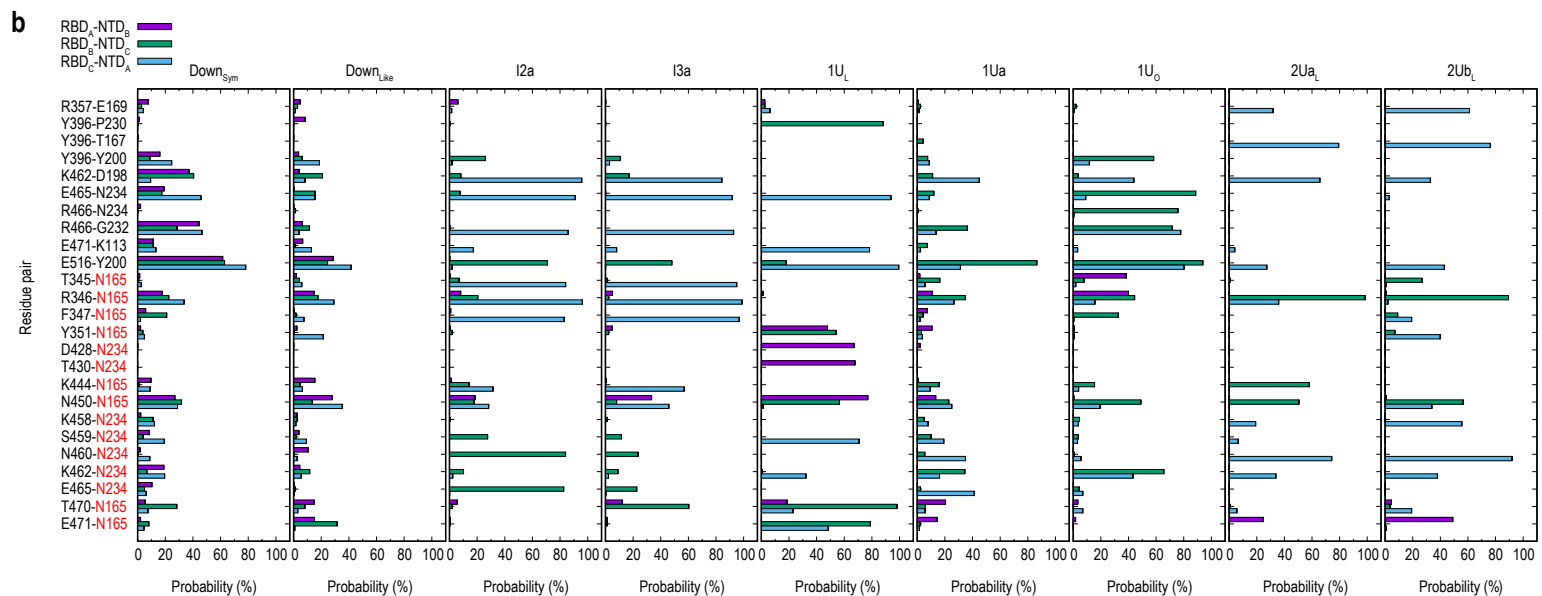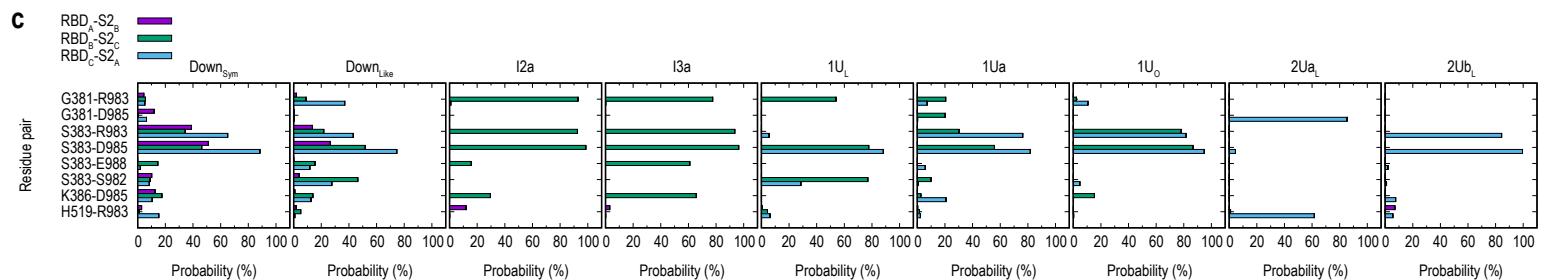

Supplement: supp [file elife-75720-supp-v1.zip]

**a** Head region Down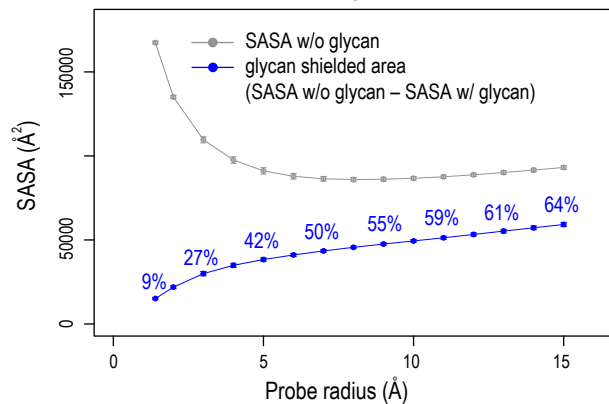**b** Head region 1U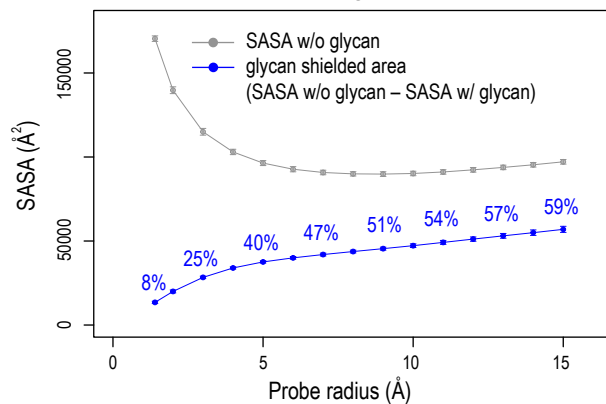**c** RBD-A<sub>RBM</sub> Down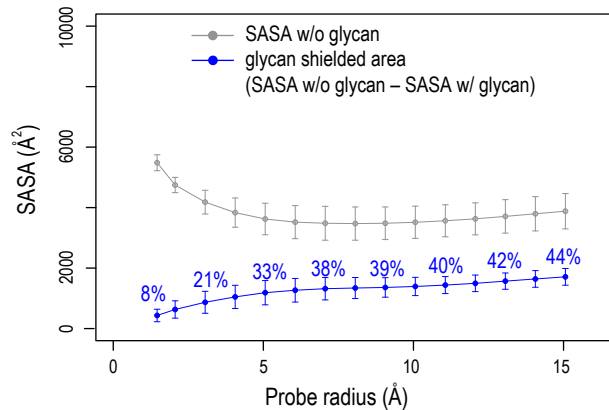**d** RBD-A<sub>RBM</sub> 1U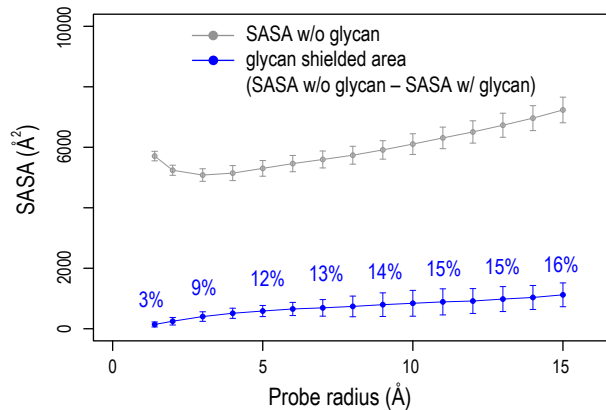

Supplement: supp [file elife-75720-supp-v1.zip]

1Ua

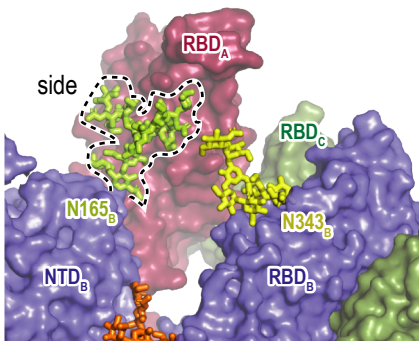

1Ub

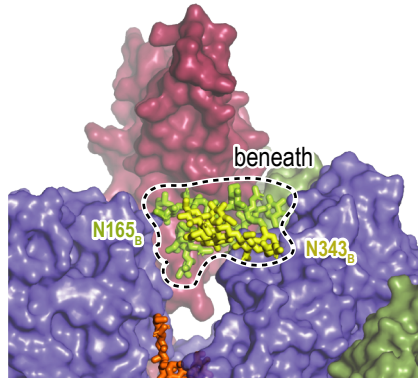

1Uc

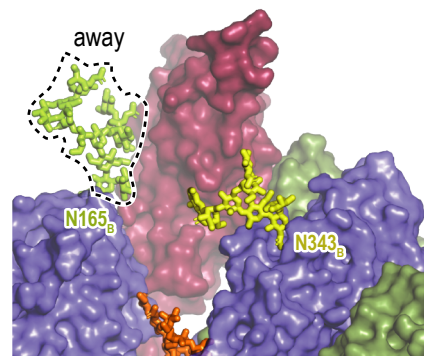1U<sub>L</sub>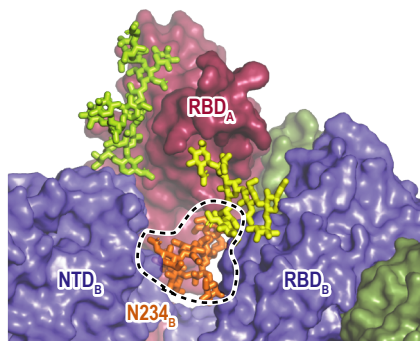1U<sub>O</sub>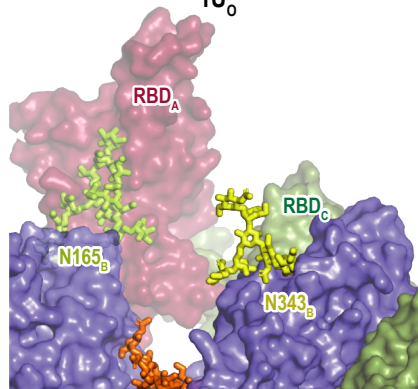

Supplement: supp [file elife-75720-supp-v1.zip]

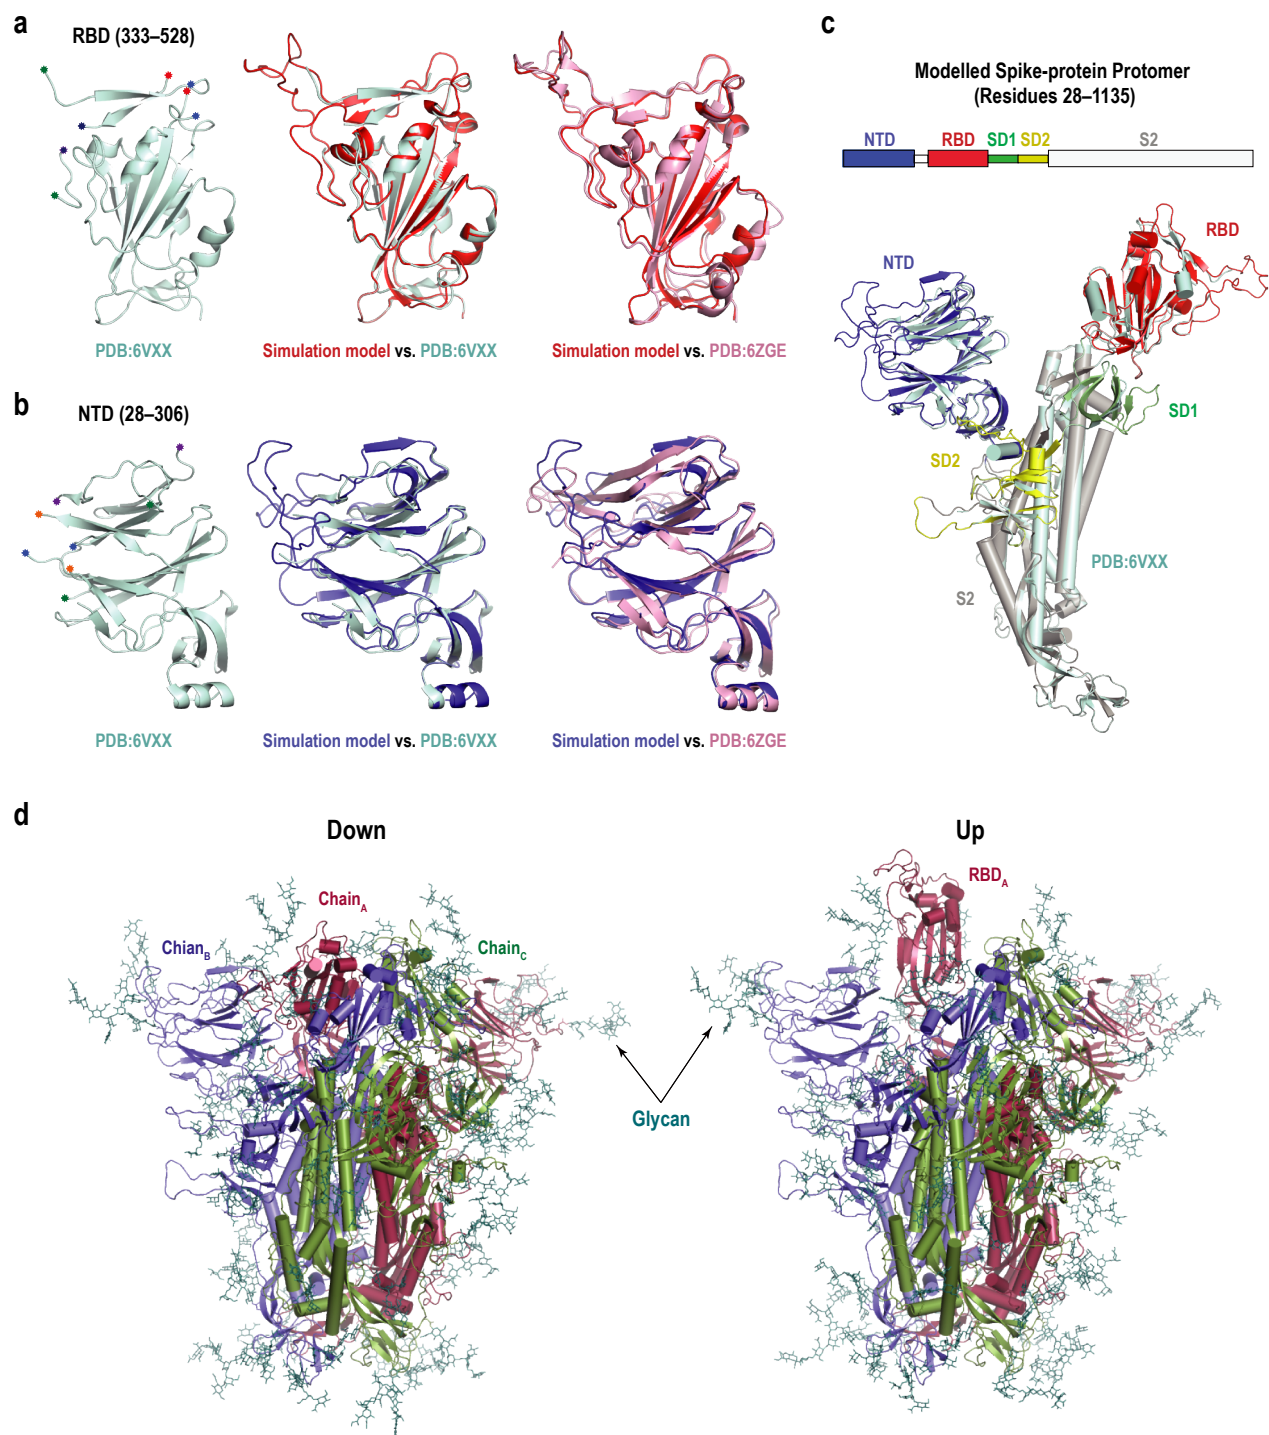

Supplement: supp [file elife-75720-supp-v1.zip]

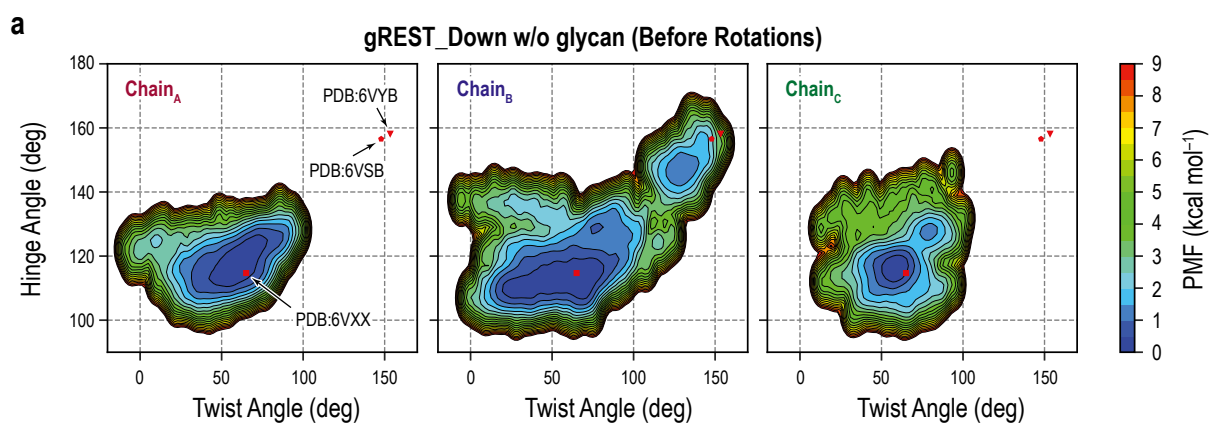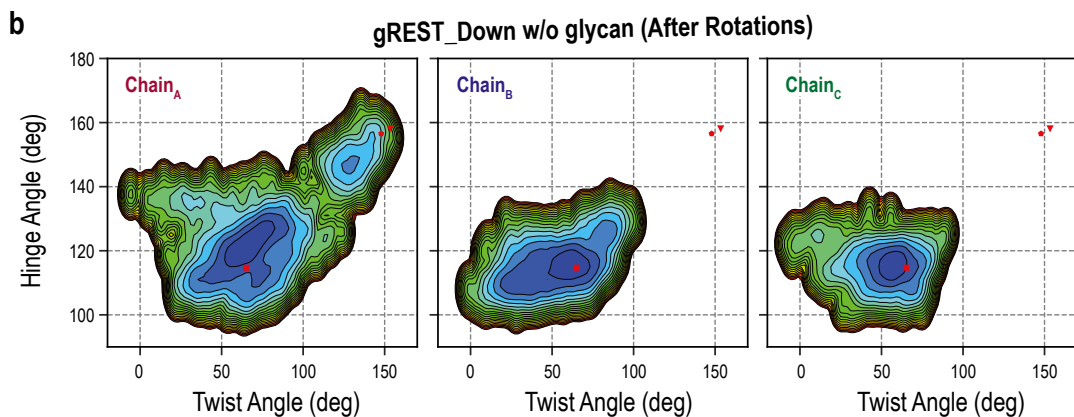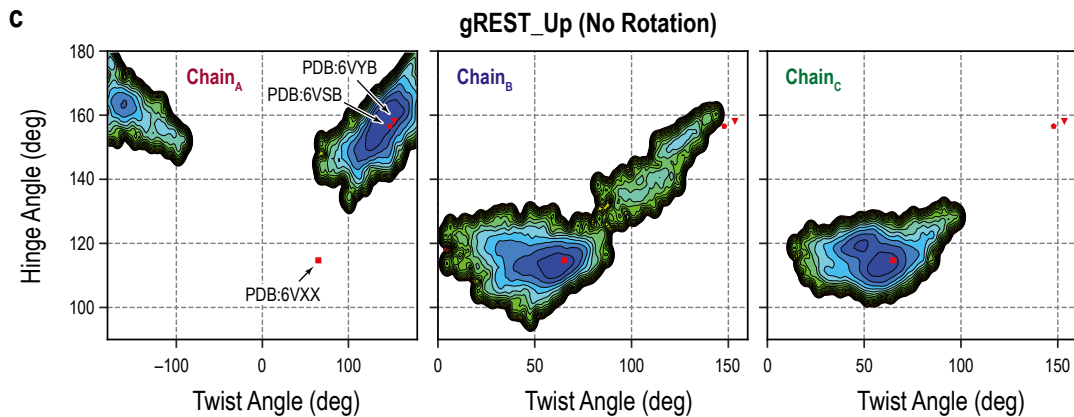

Supplement: supp [file elife-75720-supp-v1.zip]

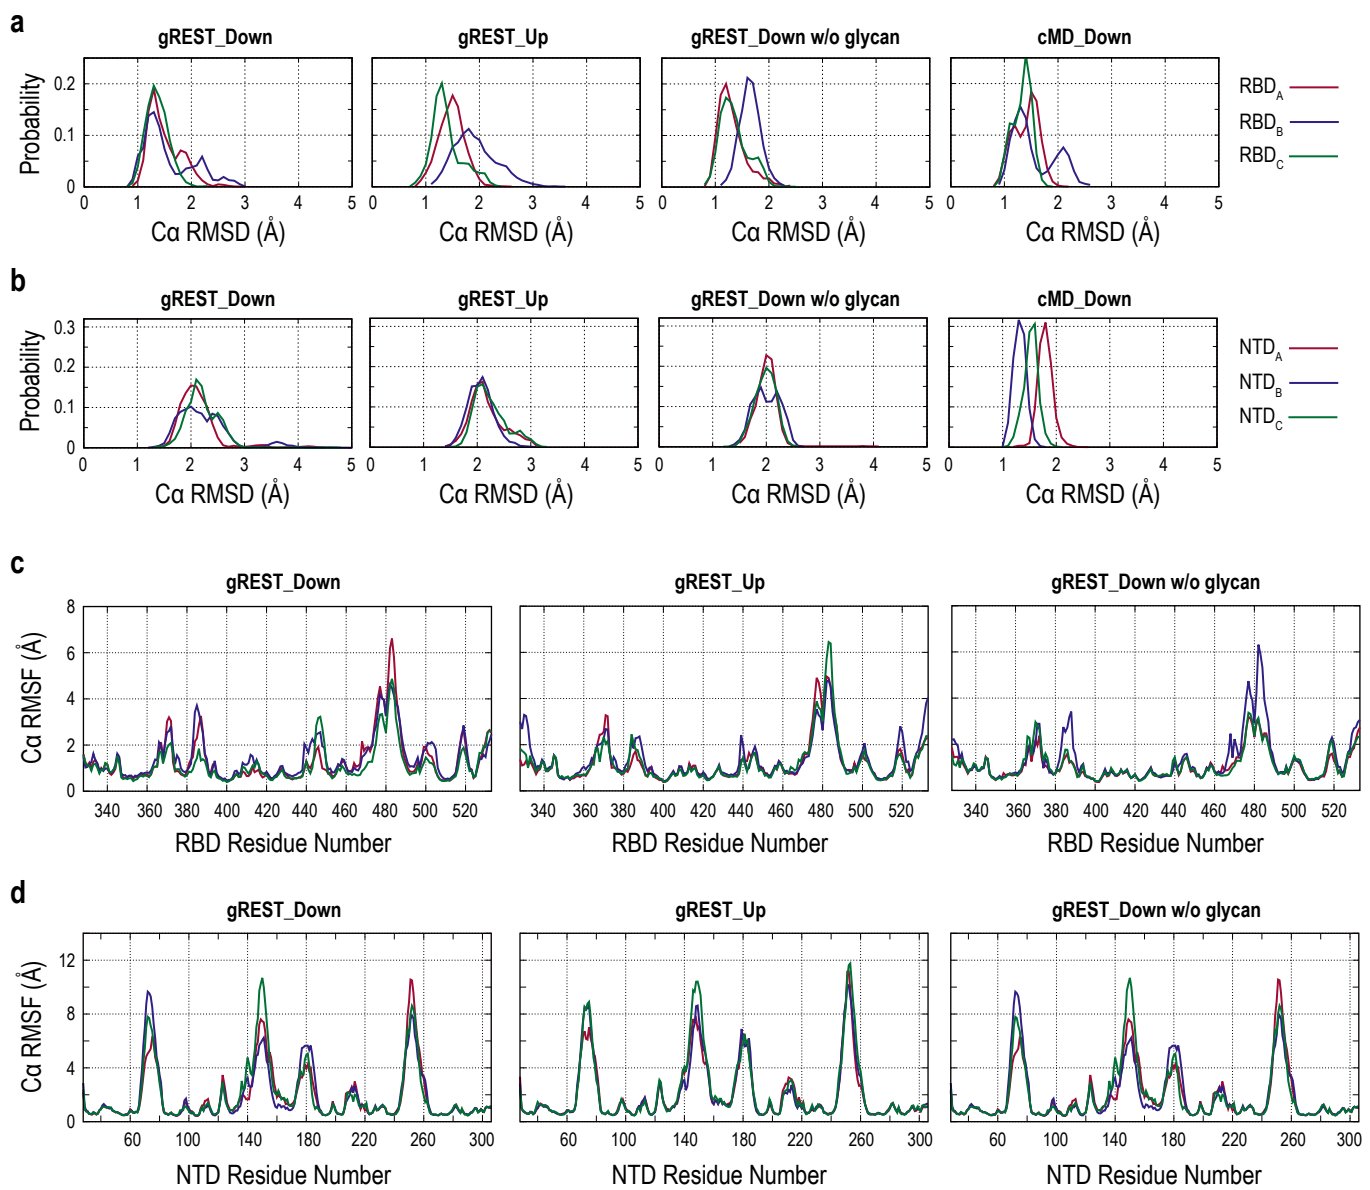

Supplement: supp [file elife-75720-supp-v1.zip]

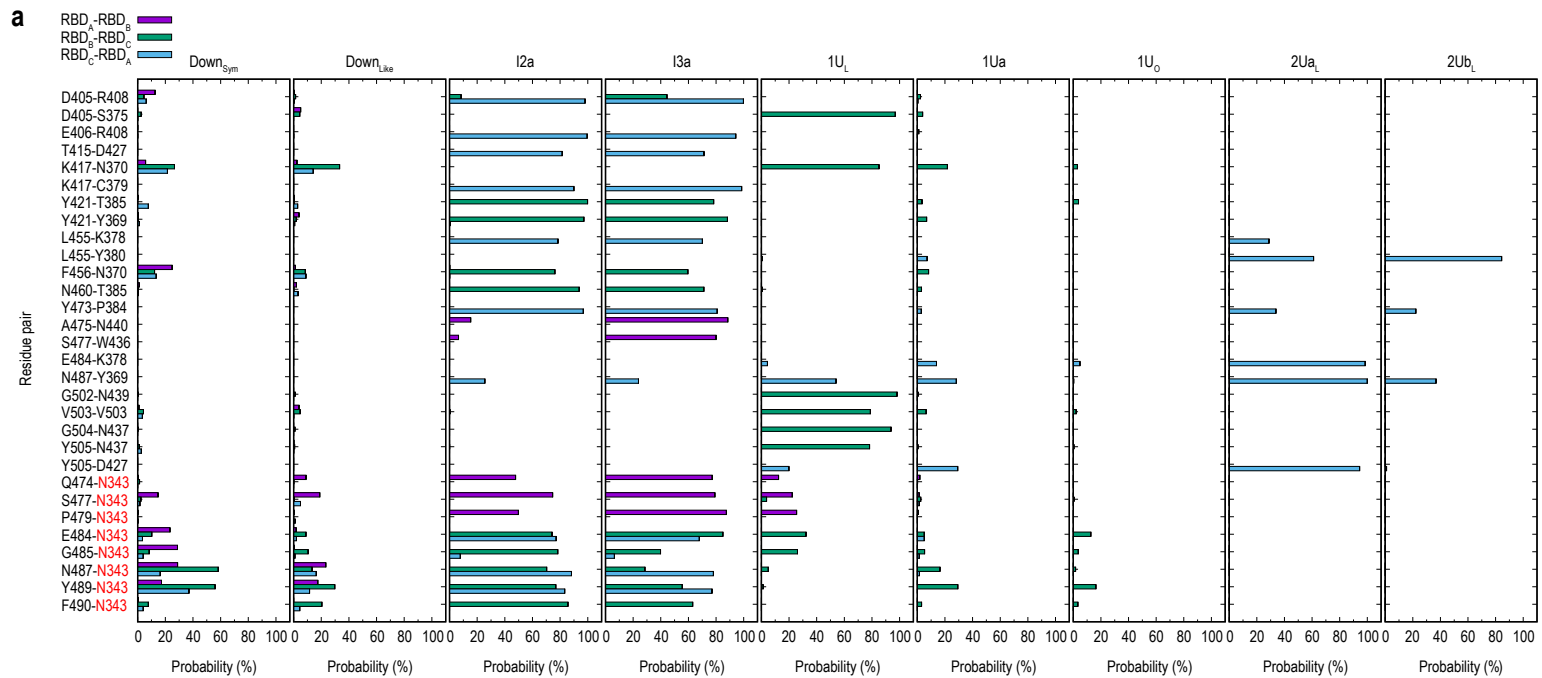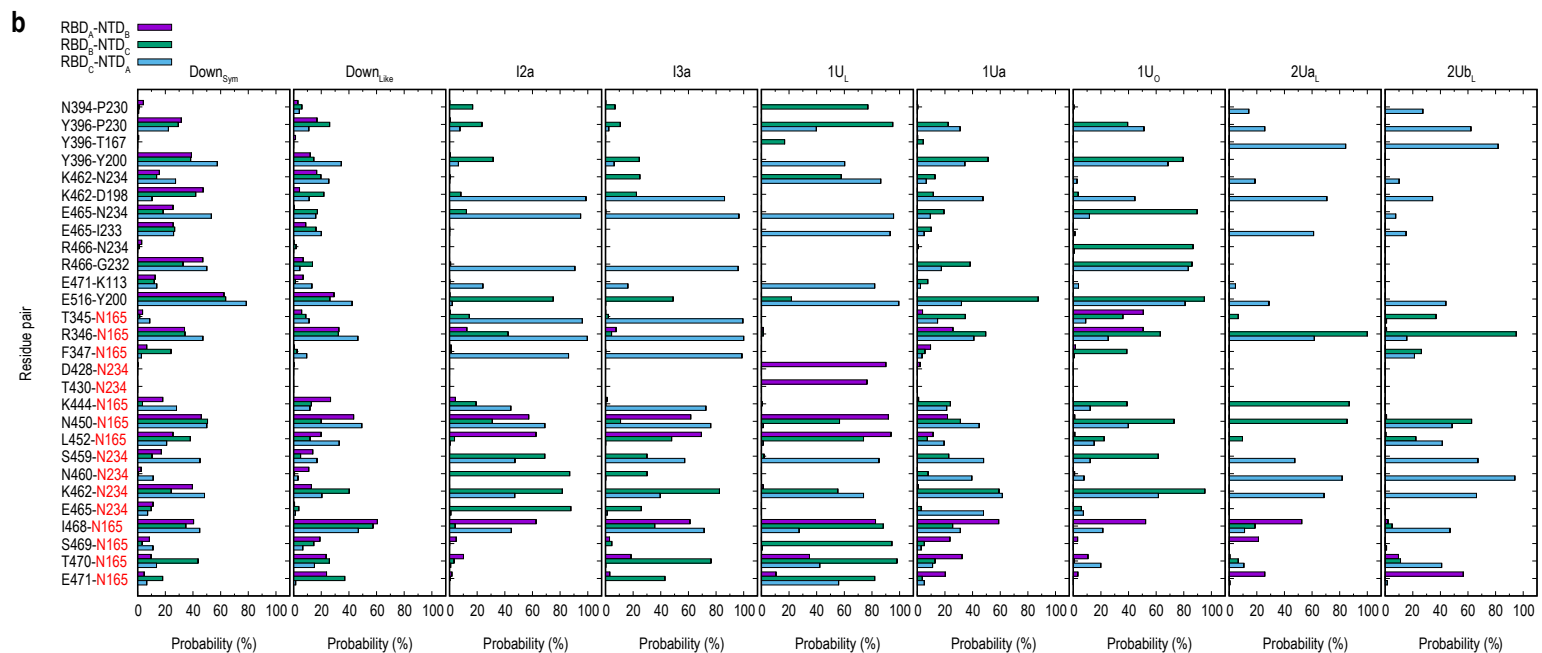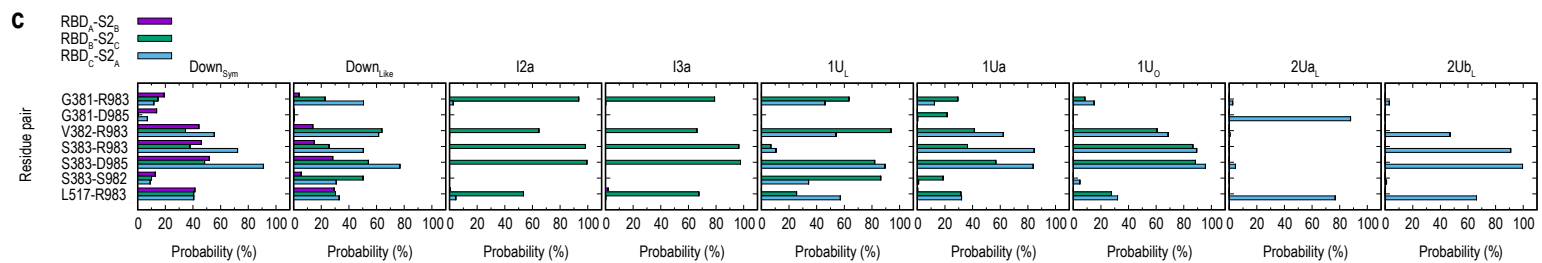

Supplement: supp [file elife-75720-supp-v1.zip]

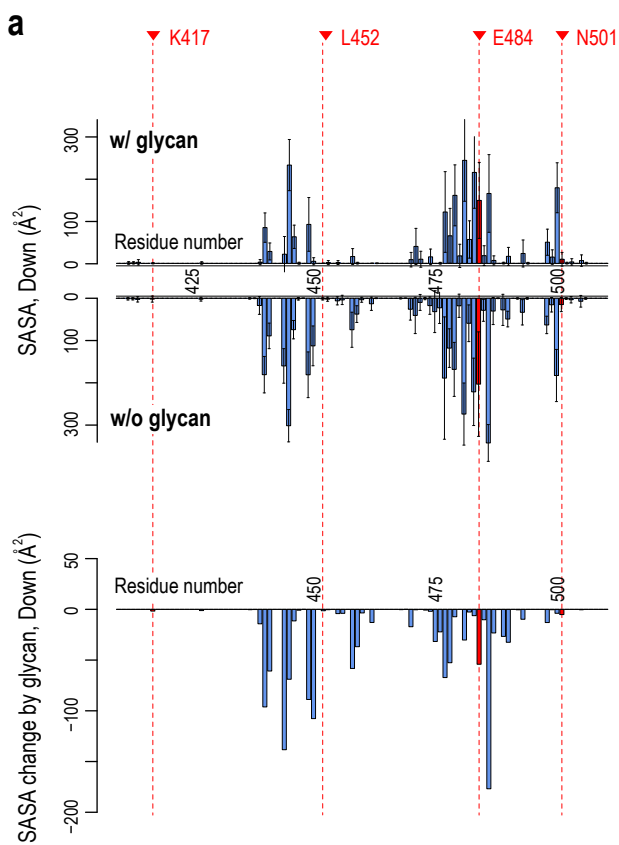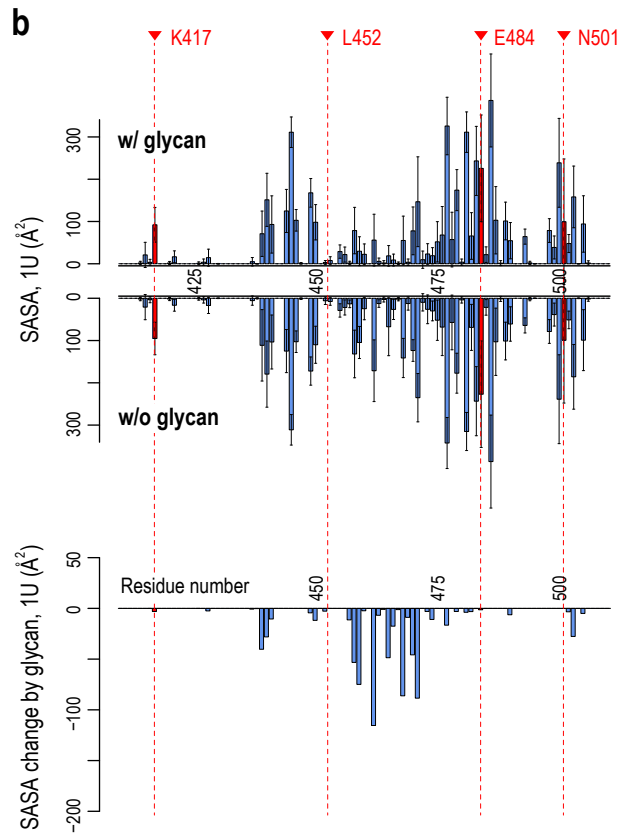

Supplement: supp [file elife-75720-supp-v1.zip]

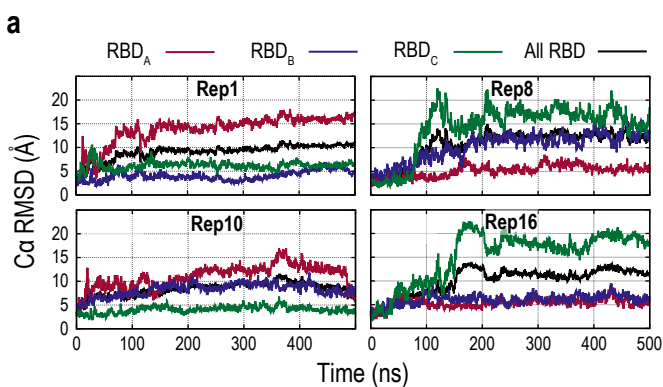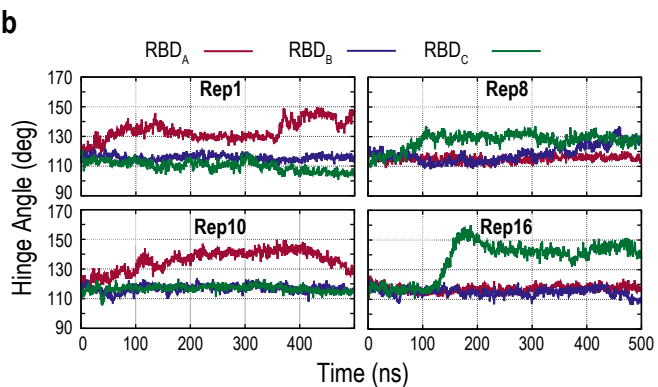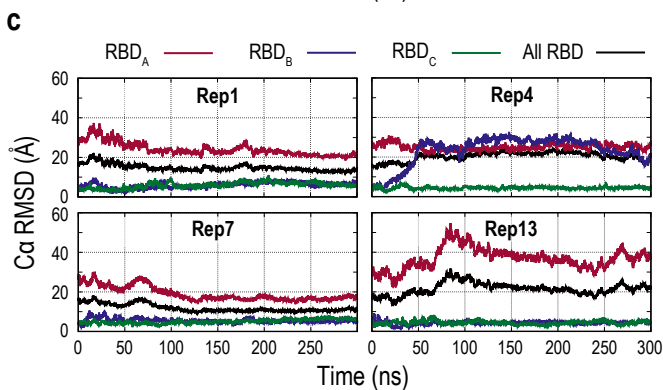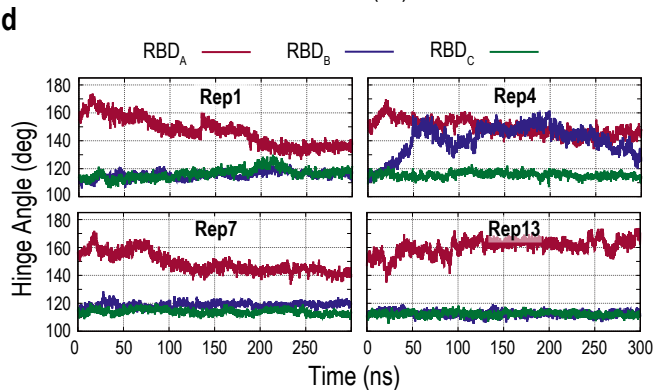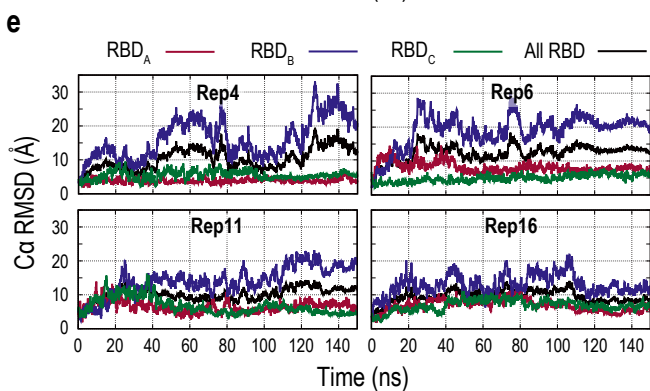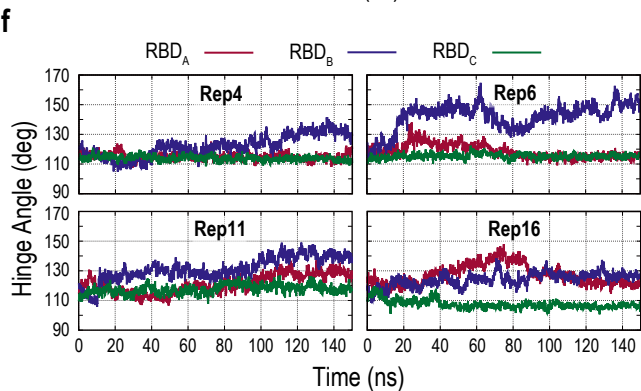

Supplement: supp [file elife-75720-supp-v1.zip]

**a**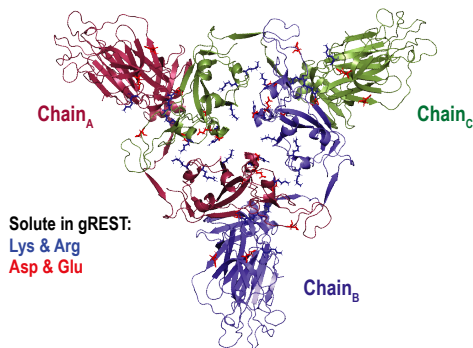**b**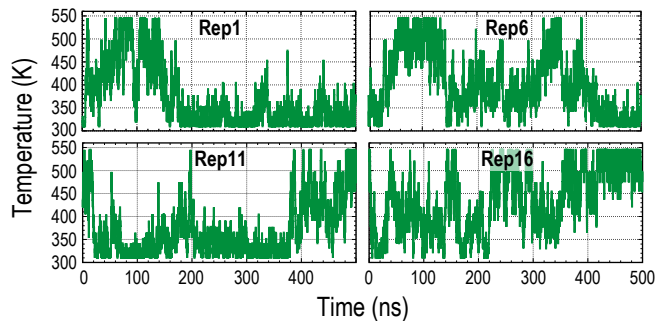**c**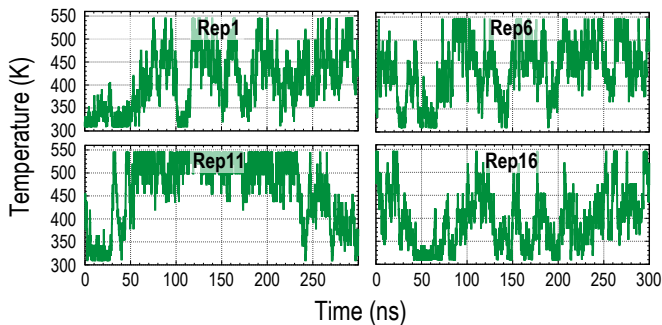**d**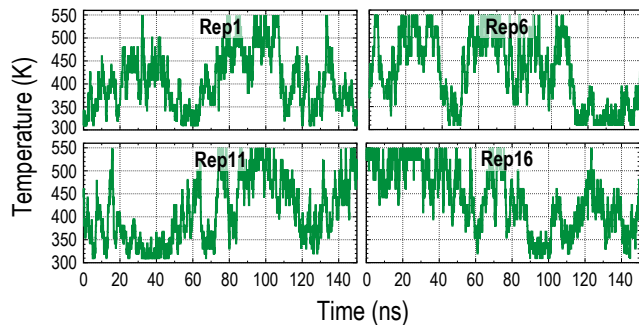**e**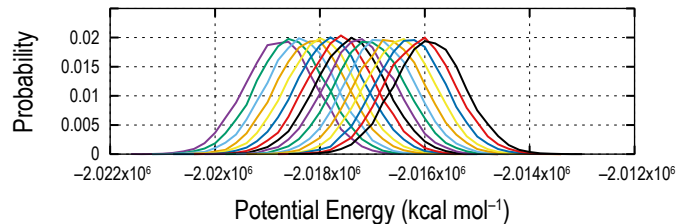**f**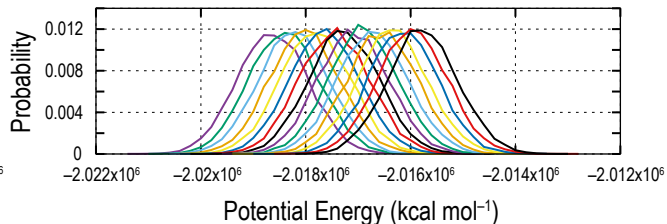

Supplement: supp [file elife-75720-supp-v1.zip]

# 1) k-means Clustering (RBD/NTD)

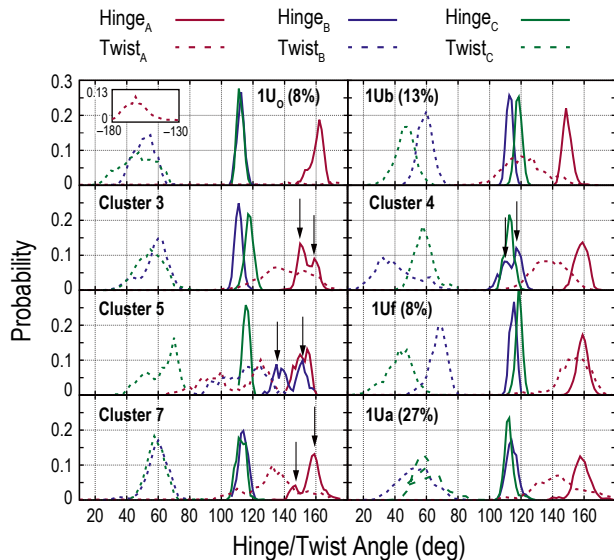

## 2) Clusters (3, 4, 5 and 7) Refinement

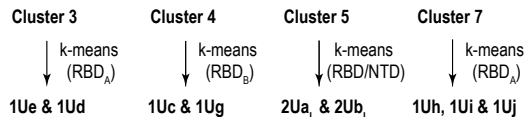

# 3) Refined Clusters

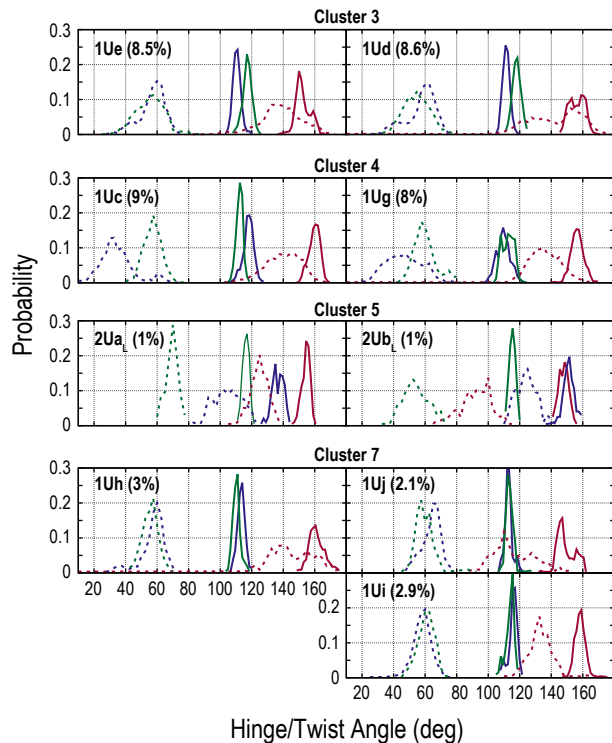

Supplement: supp [file elife-75720-supp-v1.zip]
